# Supplementary material for: Inverse association of serum carotenoid levels with prevalence of hypertension in the general adult population
Source: PubMed Central journal article supplement (PMC9563225; doi:10.3389/fnut.2022.971879), 2022-09-29
Supplement: Data_Sheet_1.pdf [file Data_Sheet_1.pdf]

## **Inverse association of serum carotenoid levels with prevalence of hypertension in the general adult population**

**Running title:** Serum carotenoids and hypertension

Xu Zhu <sup>1†</sup>; Mengsha Shi <sup>1†</sup>; Hui Pang <sup>1</sup>; Iokfai Cheang <sup>1</sup>; Qingqing Zhu <sup>1</sup>; Qixin Guo <sup>1</sup>; Rongrong Gao <sup>1</sup>; Shengen Liao <sup>1</sup>; Yanli Zhou <sup>1</sup>; Haifeng Zhang <sup>1,2,\*</sup>; Xinli Li <sup>1,\*</sup>; Wenming Yao <sup>1,\*</sup>

† These authors contributed equally to this work.

### **Department and institution of origin:**

<sup>1</sup>Department of Cardiology, The First Affiliated Hospital of Nanjing Medical University, Jiangsu Province Hospital, Nanjing, 210029, China.

<sup>2</sup>Department of Cardiology, The Affiliated Suzhou Hospital of Nanjing Medical University, Suzhou Municipal Hospital, Suzhou, 215002, China.

### **\*Corresponding author:**

Wenming Yao, MD, PhD

Department of Cardiology, The First Affiliated Hospital of Nanjing Medical University, Jiangsu Province Hospital, Nanjing, 210029, China.

Email: [yaowenming1st@163.com](mailto:yaowenming1st@163.com)

Xinli Li, MD, PhD

Department of Cardiology, The First Affiliated Hospital of Nanjing Medical University, Jiangsu Province Hospital, Nanjing, 210029, China.

Email: [xinli3267@njmu.edu.cn](mailto:xinli3267@njmu.edu.cn)

Haifeng Zhang, MD, PhD

Department of Cardiology, The First Affiliated Hospital of Nanjing Medical University, Jiangsu Province Hospital, Nanjing, 210029, China.

Department of Cardiology, The Affiliated Suzhou Hospital of Nanjing Medical University, Suzhou Municipal Hospital, Suzhou, 215002, China.

Email: [haifeng\\_zhang@163.com](mailto:haifeng_zhang@163.com)

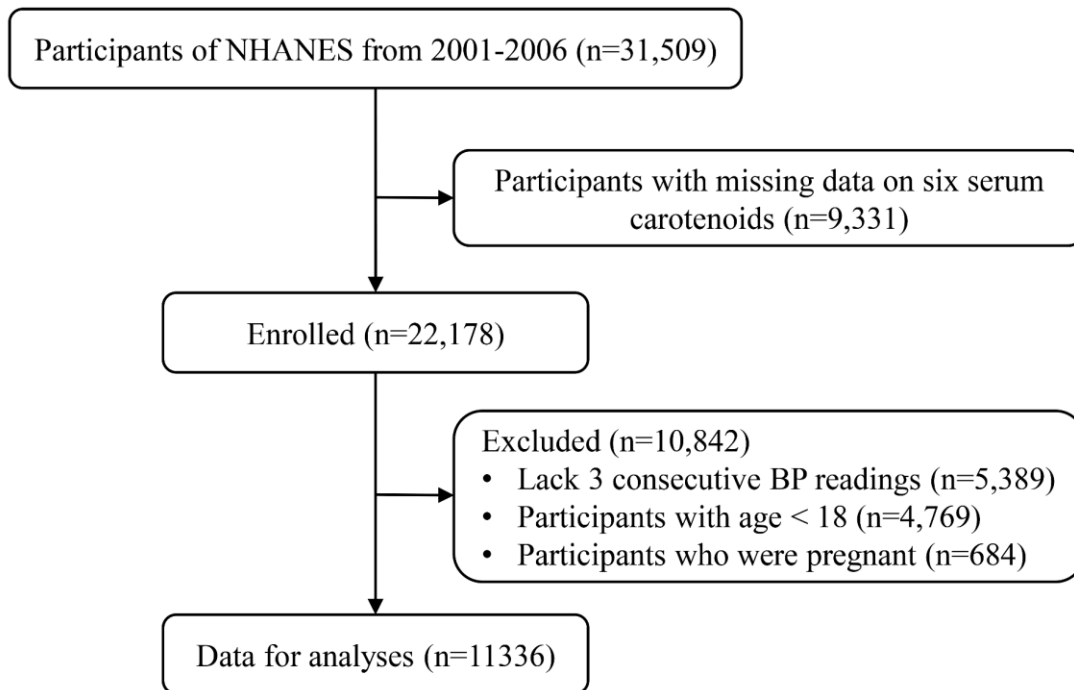

**Supplemental Figure 1.** Eligible participants in the evaluation of the influence between six serum carotenoids and the prevalence of hypertension in the general adult population.

**Supplemental Table 1.** Distributions and concentrations of serum carotenoids, dietary carotenoids, dietary antioxidant micronutrients and serum nutrient biomarkers.

| Variables                                  | N     | Mean    | 5 <sup>th</sup> | 25 <sup>th</sup> | 50 <sup>th</sup> | 75 <sup>th</sup> | 95 <sup>th</sup> |
|--------------------------------------------|-------|---------|-----------------|------------------|------------------|------------------|------------------|
| <b>Serum carotenoids</b>                   |       |         |                 |                  |                  |                  |                  |
| $\alpha$ -carotene, $\mu\text{g/dL}$       | 11336 | 4.36    | 0.50            | 1.42             | 2.70             | 5.09             | 13.20            |
| $\beta$ -cryptoxanthin, $\mu\text{g/dL}$   | 11336 | 9.29    | 2.40            | 4.70             | 7.21             | 11.40            | 23.00            |
| Lutein/zeaxanthin, $\mu\text{g/dL}$        | 11336 | 15.63   | 6.00            | 9.80             | 13.80            | 19.30            | 31.40            |
| Trans-lycopene, $\mu\text{g/dL}$           | 11336 | 23.82   | 7.60            | 15.70            | 22.69            | 30.59            | 43.70            |
| Trans- $\beta$ -carotene, $\mu\text{g/dL}$ | 11336 | 18.22   | 3.30            | 7.20             | 12.00            | 21.70            | 52.67            |
| Cis- $\beta$ -carotene, $\mu\text{g/dL}$   | 11336 | 1.07    | 0.40            | 0.49             | 0.70             | 1.20             | 3.00             |
| Total carotenoid, $\mu\text{g/dL}$         | 11336 | 72.60   | 28.97           | 47.70            | 64.40            | 87.90            | 141.80           |
| <b>Dietary carotenoids</b>                 |       |         |                 |                  |                  |                  |                  |
| $\alpha$ -Carotene, $\mu\text{g/day}$      | 10971 | 383.52  | 0.00            | 20.00            | 61.50            | 350.00           | 1840.00          |
| $\beta$ -Carotene, $\mu\text{g/day}$       | 10971 | 2017.06 | 95.50           | 374.00           | 922.00           | 2438.50          | 7233.50          |
| $\beta$ -Cryptoxanthin, $\mu\text{g/day}$  | 10971 | 141.60  | 0.50            | 9.50             | 40.00            | 176.00           | 571.00           |
| Lycopene, $\mu\text{g/day}$                | 10971 | 6277.19 | 0.00            | 417.50           | 2634.50          | 8083.50          | 24271.00         |
| Lutein/zeaxanthin, $\mu\text{g/day}$       | 10971 | 1455.95 | 107.00          | 387.00           | 757.00           | 1492.00          | 4922.00          |
| <b>Dietary antioxidant micronutrients</b>  |       |         |                 |                  |                  |                  |                  |
| Retinol, $\mu\text{g/day}$                 | 10971 | 431.36  | 55.00           | 189.50           | 337.50           | 549.00           | 1035.50          |
| Zinc, $\text{mg/day}$                      | 10971 | 12.39   | 4.21            | 7.51             | 10.81            | 15.32            | 25.28            |
| Selenium, $\text{mg/day}$                  | 10971 | 110.86  | 41.20           | 72.80            | 100.45           | 136.90           | 212.95           |
| Copper, $\text{mg/day}$                    | 10971 | 1.34    | 0.52            | 0.88             | 1.19             | 1.59             | 2.51             |
| Vitamin A, $\mu\text{g/day}$               | 10971 | 621.65  | 105.00          | 294.50           | 502.50           | 790.50           | 1494.50          |
| Vitamin E, $\text{mg/day}$                 | 10971 | 7.23    | 2.10            | 4.15             | 6.13             | 8.95             | 16.00            |
| Vitamin C, $\text{mg/day}$                 | 10971 | 89.92   | 8.10            | 29.40            | 62.95            | 120.90           | 257.60           |
| <b>Serum nutrient biomarkers</b>           |       |         |                 |                  |                  |                  |                  |
| Iron, $\mu\text{mol/L}$                    | 11301 | 15.58   | 6.60            | 11.30            | 14.50            | 19.20            | 27.80            |
| Folate, $\text{ng/mL}$                     | 11308 | 13.82   | 5.30            | 8.50             | 11.80            | 16.30            | 28.30            |
| Vitamin B12, $\text{pg/mL}$                | 11266 | 549.81  | 228.00          | 349.00           | 466.00           | 627.00           | 1020.00          |
| Vitamin A, $\mu\text{g/dL}$                | 11336 | 60.52   | 36.60           | 49.10            | 59.00            | 70.00            | 88.80            |
| Vitamin E, $\mu\text{g/dL}$                | 7717  | 1241.06 | 699.00          | 916.00           | 1140.00          | 1420.00          | 2150.00          |
| Vitamin C, $\text{mg/dL}$                  | 7014  | 0.95    | 0.17            | 0.61             | 0.94             | 1.23             | 1.75             |

N, number of urinary samples; 5<sup>th</sup>, 5th percentile; 25<sup>th</sup>, 25th percentile; 50<sup>th</sup>, 50th percentile; 75<sup>th</sup>, 75th percentile; 95<sup>th</sup>, 95th percentile.

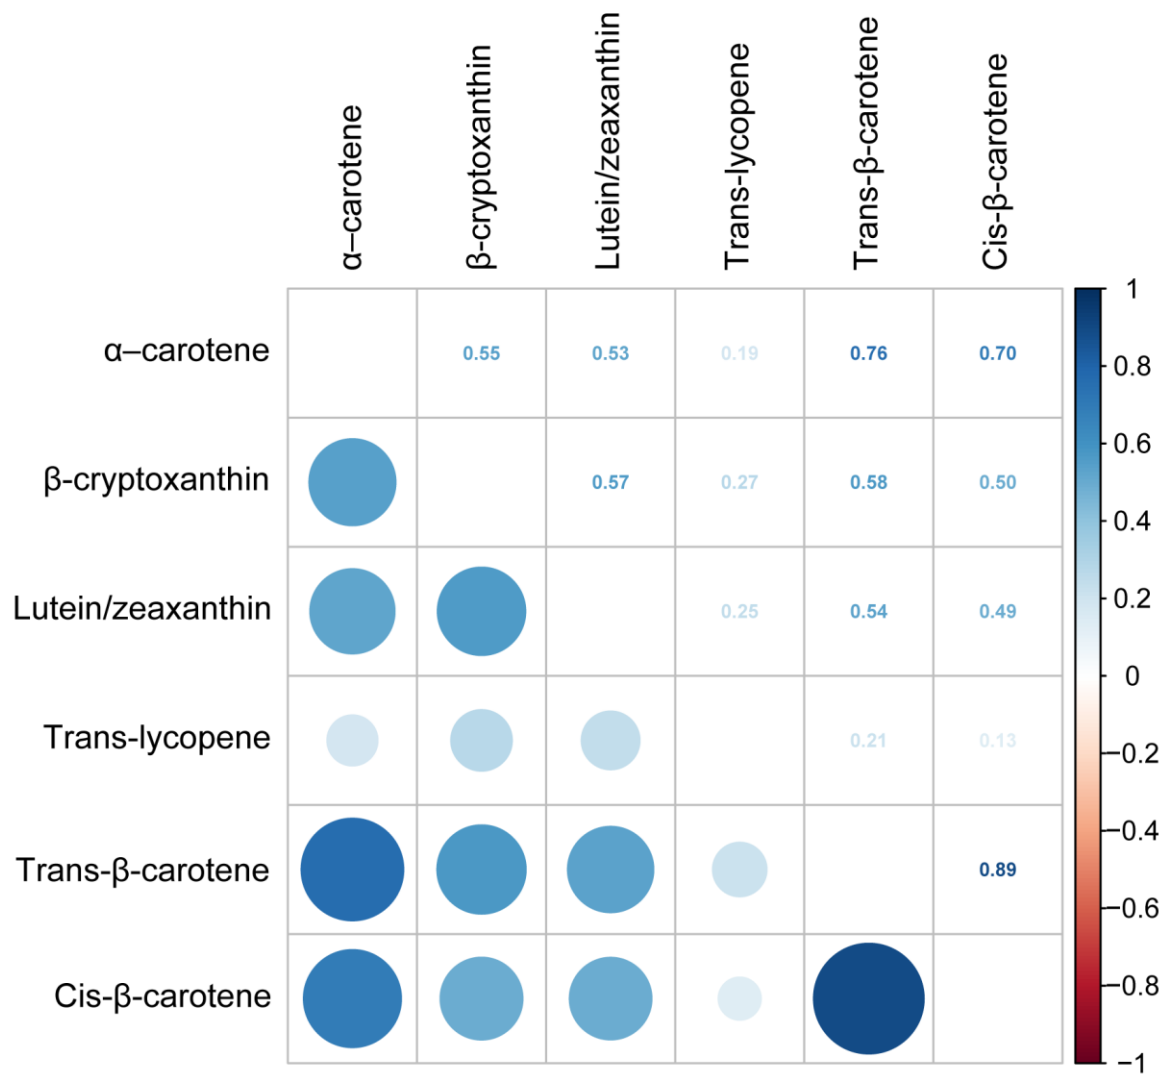

**Supplemental Figure 2.** Pairwise Pearson correlation coefficients between six serum carotenoids in adults.

**Supplemental Table 2.** OR (95% CIs) of hypertension (SBP $\geq$ 140mmHg and/or DBP $\geq$ 90mmHg) according to quartiles of serum carotenoids concentrations among the general adult population with further adjustment of dietary carotenoids and antioxidant micronutrients and serum nutrient biomarkers in NHANES 2001–2006.

| Carotenoids                                  | Quartiles of serum carotenoids (ug/dL) |                  |                  |                  | <i>P</i> <sub>trend</sub> |
|----------------------------------------------|----------------------------------------|------------------|------------------|------------------|---------------------------|
|                                              | Quartile 1                             | Quartile 2       | Quartile 3       | Quartile 4       |                           |
| Model + dietary carotenoids *                |                                        |                  |                  |                  |                           |
| $\alpha$ -Carotene                           | 1.00                                   | 0.82 (0.66-1.03) | 0.71 (0.60-0.83) | 0.60 (0.49-0.73) | <0.001                    |
| $\beta$ -cryptoxanthin                       | 1.00                                   | 0.80 (0.64-0.99) | 0.68 (0.56-0.82) | 0.66 (0.53-0.82) | <0.001                    |
| Lutein/zeaxanthin                            | 1.00                                   | 0.91 (0.73-1.13) | 0.91 (0.73-1.14) | 0.85 (0.69-1.06) | 0.157                     |
| Trans-lycopene                               | 1.00                                   | 0.96 (0.78-1.18) | 0.84 (0.71-1.01) | 0.89 (0.70-1.13) | 0.200                     |
| Trans- $\beta$ -carotene                     | 1.00                                   | 0.79 (0.68-0.93) | 0.65 (0.52-0.80) | 0.46 (0.37-0.57) | <0.001                    |
| Cis- $\beta$ -carotene                       | 1.00                                   | 0.80 (0.58-1.10) | 0.62 (0.45-0.83) | 0.46 (0.34-0.62) | <0.001                    |
| Model + dietary antioxidant micronutrients † |                                        |                  |                  |                  |                           |
| $\alpha$ -Carotene                           | 1.00                                   | 0.79 (0.63-0.99) | 0.69 (0.57-0.83) | 0.59 (0.48-0.73) | <0.001                    |
| $\beta$ -cryptoxanthin                       | 1.00                                   | 0.82 (0.65-1.04) | 0.70 (0.58-0.85) | 0.71 (0.57-0.89) | <0.001                    |
| Lutein/zeaxanthin                            | 1.00                                   | 0.90 (0.72-1.13) | 0.88 (0.70-1.11) | 0.83 (0.66-1.04) | 0.097                     |
| Trans-lycopene                               | 1.00                                   | 0.93 (0.76-1.14) | 0.83 (0.71-0.98) | 0.91 (0.72-1.14) | 0.237                     |
| Trans- $\beta$ -carotene                     | 1.00                                   | 0.77 (0.65-0.91) | 0.60 (0.49-0.74) | 0.41 (0.32-0.53) | <0.001                    |
| Cis- $\beta$ -carotene                       | 1.00                                   | 0.81 (0.59-1.11) | 0.58 (0.43-0.80) | 0.43 (0.30-0.59) | <0.001                    |
| Model + serum nutrient biomarkers ‡          |                                        |                  |                  |                  |                           |
| $\alpha$ -Carotene                           | 1.00                                   | 0.81 (0.65-1.02) | 0.70 (0.60-0.83) | 0.60 (0.48-0.74) | <0.001                    |
| $\beta$ -cryptoxanthin                       | 1.00                                   | 0.81 (0.64-1.02) | 0.68 (0.55-0.83) | 0.68 (0.55-0.84) | <0.001                    |
| Lutein/zeaxanthin                            | 1.00                                   | 0.91 (0.72-1.14) | 0.90 (0.72-1.13) | 0.84 (0.67-1.06) | 0.137                     |
| Trans-lycopene                               | 1.00                                   | 0.97 (0.79-1.19) | 0.87 (0.74-1.02) | 0.93 (0.74-1.16) | 0.293                     |
| Trans- $\beta$ -carotene                     | 1.00                                   | 0.80 (0.68-0.94) | 0.65 (0.52-0.81) | 0.47 (0.38-0.59) | <0.001                    |
| Cis- $\beta$ -carotene                       | 1.00                                   | 0.79 (0.58-1.09) | 0.61 (0.45-0.82) | 0.46 (0.34-0.62) | <0.001                    |

Model was adjusted for age, sex, education level, race, poverty, smoker, alcohol user, physical activity, energy intake levels, body mass index, hemoglobin, total cholesterol, high-density lipoprotein cholesterol, eGFR, and diabetes.

\* Further adjusted for Model + dietary carotenoids (intakes of  $\alpha$ -Carotene,  $\beta$ -Carotene,  $\beta$ -Cryptoxanthin, Lycopene, Lutein/zeaxanthin [all log<sub>2</sub>-transformed]).

† Further adjusted for Model + dietary antioxidant micronutrients (intakes of retinol, zinc, selenium, copper, vitamin A, vitamin E, vitamin C [all log<sub>2</sub>-transformed]).

‡ Further adjusted for Model + serum nutrient biomarkers (serum iron, folate, vitamin B12, vitamin A, vitamin E, and vitamin C levels [all log<sub>2</sub>-transformed]).

**Supplemental Table 3.** Multiple logistic regression associations of serum carotenoids with hypertension(SBP $\geq$ 130mmHg and/or DBP $\geq$ 80mmHg) in adults.

| Carotenoids                              | Log2-carotenoids | Quartiles of serum carotenoids (ug/dL) |                  |                  |                  | <i>P</i> <sub>trend</sub> |
|------------------------------------------|------------------|----------------------------------------|------------------|------------------|------------------|---------------------------|
|                                          |                  | Quartile 1                             | Quartile 2       | Quartile 3       | Quartile 4       |                           |
| <b><math>\alpha</math>-carotene</b>      |                  |                                        |                  |                  |                  |                           |
| Model 1                                  | 0.81 (0.78-0.85) | Ref (1.00)                             | 0.69 (0.59-0.81) | 0.61 (0.52-0.71) | 0.50 (0.41-0.60) | <0.001                    |
| Model 2                                  | 0.81 (0.77-0.85) | Ref (1.00)                             | 0.70 (0.59-0.82) | 0.61 (0.52-0.72) | 0.49 (0.40-0.61) | <0.001                    |
| Model 3                                  | 0.87 (0.83-0.91) | Ref (1.00)                             | 0.70 (0.58-0.85) | 0.68 (0.58-0.79) | 0.63 (0.52-0.79) | <0.001                    |
| <b><math>\beta</math>-cryptoxanthin</b>  |                  |                                        |                  |                  |                  |                           |
| Model 1                                  | 0.83 (0.78-0.88) | Ref (1.00)                             | 0.84 (0.71-0.99) | 0.65 (0.55-0.76) | 0.58 (0.48-0.70) | <0.001                    |
| Model 2                                  | 0.81 (0.76-0.86) | Ref (1.00)                             | 0.80 (0.67-0.95) | 0.62 (0.52-0.73) | 0.54 (0.44-0.67) | <0.001                    |
| Model 3                                  | 0.87 (0.82-0.93) | Ref (1.00)                             | 0.85 (0.72-1.00) | 0.69 (0.58-0.82) | 0.69 (0.56-0.85) | <0.001                    |
| <b>Lutein/zeaxanthin</b>                 |                  |                                        |                  |                  |                  |                           |
| Model 1                                  | 0.78 (0.71-0.87) | Ref (1.00)                             | 0.90 (0.76-1.06) | 0.78 (0.66-0.93) | 0.67 (0.54-0.82) | <0.001                    |
| Model 2                                  | 0.75 (0.67-0.84) | Ref (1.00)                             | 0.88 (0.74-1.04) | 0.75 (0.62-0.90) | 0.63 (0.50-0.80) | <0.001                    |
| Model 3                                  | 0.80 (0.71-0.89) | Ref (1.00)                             | 0.95 (0.79-1.14) | 0.82 (0.68-0.99) | 0.73 (0.58-0.92) | 0.004                     |
| <b>Trans-lycopene</b>                    |                  |                                        |                  |                  |                  |                           |
| Model 1                                  | 0.97 (0.90-1.05) | Ref (1.00)                             | 0.98 (0.83-1.15) | 0.91 (0.77-1.08) | 0.95 (0.79-1.14) | 0.470                     |
| Model 2                                  | 0.98 (0.91-1.06) | Ref (1.00)                             | 1.01 (0.85-1.19) | 0.93 (0.78-1.11) | 0.96 (0.80-1.16) | 0.544                     |
| Model 3                                  | 0.91 (0.83-0.99) | Ref (1.00)                             | 0.98 (0.82-1.17) | 0.88 (0.73-1.06) | 0.84 (0.69-1.02) | 0.042                     |
| <b>Trans-<math>\beta</math>-carotene</b> |                  |                                        |                  |                  |                  |                           |
| Model 1                                  | 0.75 (0.71-0.79) | Ref (1.00)                             | 0.67 (0.59-0.77) | 0.59 (0.50-0.68) | 0.37 (0.30-0.45) | <0.001                    |
| Model 2                                  | 0.73 (0.69-0.77) | Ref (1.00)                             | 0.66 (0.58-0.76) | 0.57 (0.48-0.66) | 0.35 (0.28-0.43) | <0.001                    |
| Model 3                                  | 0.79 (0.75-0.84) | Ref (1.00)                             | 0.72 (0.63-0.83) | 0.66 (0.56-0.77) | 0.46 (0.37-0.58) | <0.001                    |
| <b>Cis-<math>\beta</math>-carotene</b>   |                  |                                        |                  |                  |                  |                           |
| Model 1                                  | 0.72 (0.67-0.77) | Ref (1.00)                             | 0.85 (0.68-1.07) | 0.66 (0.53-0.82) | 0.42 (0.32-0.55) | <0.001                    |
| Model 2                                  | 0.70 (0.65-0.75) | Ref (1.00)                             | 0.84 (0.67-1.06) | 0.64 (0.51-0.79) | 0.39 (0.30-0.52) | <0.001                    |
| Model 3                                  | 0.79 (0.73-0.85) | Ref (1.00)                             | 0.88 (0.69-1.12) | 0.73 (0.58-0.91) | 0.52 (0.40-0.70) | <0.001                    |

Model 1 was adjusted as age, sex;

Model 2 was adjusted as model 1 plus race, education levels, smoker, and alcohol user;

Model 3 was adjusted as model 2 plus physical activity, energy intake levels, body mass index, hemoglobin, total cholesterol, high-density lipoprotein cholesterol, eGFR, and diabetes.

Ref: reference; CI, confidence interval.

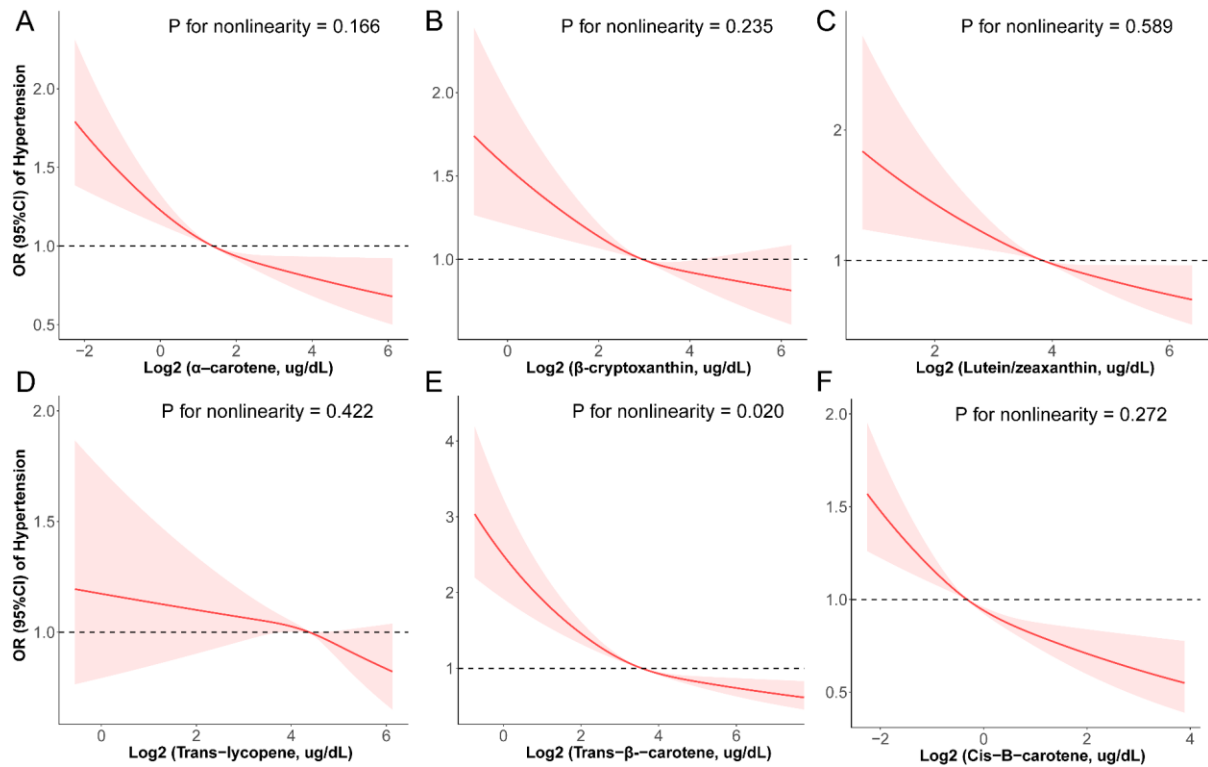

**Supplemental Figure 3.** Restricted cubic spline (RCS) analysis with multivariate-adjusted associations between six serum carotenoids and prevalence of hypertension (SBP $\geq$ 130mmHg and/or DBP $\geq$ 80mmHg) in adults. Models are adjusted for age, sex, education level, race, poverty, smoker, alcohol user, physical activity, energy intake levels, body mass index, hemoglobin, total cholesterol, high-density lipoprotein cholesterol, eGFR, and diabetes.
